# Supplementary material for: Quantitative In-Depth Transcriptome Analysis Implicates Peritoneal Macrophages as Important Players in the Complement and Coagulation Systems
Source: MDPI journal article supplement (doi:10.3390/ijms23031185), 2022-01-21
Supplement: s1 [file s1]

Supplementary Table S1. Human Monocyte samples

| <b>Human -Monocytes-Ampliseq</b>              |                        |                        |                          |                       |                          |
|-----------------------------------------------|------------------------|------------------------|--------------------------|-----------------------|--------------------------|
|                                               | <b>Male<br/>Age 51</b> | <b>Male<br/>Age 43</b> | <b>Female<br/>Age 47</b> | <b>Male<br/>Age28</b> | <b>Female<br/>Age 61</b> |
| <b>A. Amyloids and General Transcr</b>        |                        |                        |                          |                       |                          |
| <b>Saa3</b> (serum amyloid, apolipoprotein)   | 0                      | 0                      | 0                        | 0                     | 0                        |
| <b>Saa1</b> (serum amyloid, apolipoprotein)   | 0                      | 0                      | 0                        | 0                     | 0                        |
| <b>Saa2</b> (serum amyloid, apolipoprotein)   | 0                      | 0                      | 0                        | 0                     | 0                        |
| <b>Saa4</b> (serum amyloid, apolipoprotein)   | 0                      | 0                      | 0                        | 0                     | 0                        |
|                                               |                        |                        |                          |                       |                          |
| <b>Actb</b> (beta actin)                      | 19693                  | 21775                  | 32168                    | 14866                 | 23328                    |
| <b>Tcn2</b> (Transcobalmin)                   | 21                     | 29                     | 48                       | 10                    | 15                       |
| <b>Tln1</b> (Talin 1 cytoskeletal memb. con.) | 248                    | 135                    | 88                       | 51                    | 74                       |
| <b>Itsn1</b> (Intersectin 1 membrane traf.)   | 0.1                    | 0                      | 0                        | 0.2                   | 0.6                      |
| <b>Grn</b> (Granulin)                         | 588                    | 689                    | 2558                     | 682                   | 1041                     |
| <b>Bst1</b> (ADP-ribosyl cyclase 2)           | 100                    | 88                     | 4.2                      | 16                    | 19                       |
| <b>Gda</b> (Guanine deaminase)                | 0                      | 0                      | 0                        | 0                     | 0                        |
| <b>Hamp</b> (Hepsidin Iron import)            | 0.7                    | 0                      | 0.3                      | 1.7                   | 0.1                      |
| <b>Ninj1</b> (Ninjurin 1 apoptosis signal?)   | 578                    | 413                    | 229                      | 240                   | 323                      |
| <b>Hal</b> (Histidine amonia lyase)           | 9                      | 16                     | 39                       | 31                    | 33                       |
| <b>Hdc</b> (Histidine decarboxylase)          | 0                      | 0                      | 0.1                      | 0                     | 0.1                      |
| <b>Hrg</b> (Histidine rich glycoprotein)      | 0                      | 0                      | 0                        | 0                     | 0                        |
|                                               |                        |                        |                          |                       |                          |
| <b>B. Extracellular matrix</b>                |                        |                        |                          |                       |                          |
| <b>Fn1</b> (Fibronectin)                      | 0                      | 0.1                    | 0                        | 0                     | 0                        |
| <b>Prg4</b> (Proteoglycan 4, Lubricin)        | 0                      | 0                      | 0                        | 0                     | 0                        |
| <b>Srgn</b> (Serglycin)                       | 3855                   | 3641                   | 4976                     | 1310                  | 5214                     |
| <b>Sdc3</b> (Syndecan 3)                      | 5                      | 2                      | 6                        | 6                     | 7                        |
| <b>Ecm1</b> (Extracellular matrix prot.1)     | 1                      | 0.5                    | 2                        | 0                     | 1                        |
|                                               |                        |                        |                          |                       |                          |
| <b>C. Anti-microbial proteins</b>             |                        |                        |                          |                       |                          |
| <b>Lyz1</b> (Lysozyme)                        | 27394                  | 29951                  | 11290                    | 25335                 | 16400                    |
| <b>Defb</b> (Beta-defensins)                  | 0                      | 0                      | 0.2                      | 0                     | 0.1                      |
| <b>Camp</b> (Cathelicidin)                    | 1                      | 1                      | 2                        | 3.                    | 2                        |
|                                               |                        |                        |                          |                       |                          |
| <b>Cybb</b> (Cytochr.b-245 (Nox2) Cytb558)    | 1081                   | 1684                   | 1423                     | 677                   | 867                      |
| <b>Padi4</b> (Peptidyl arg. deim. type IV)    | 77                     | 61                     | 51                       | 100                   | 31                       |
| <b>Flnb</b> (Filamin B fagocytosis)           | 9                      | 10                     | 10                       | 10                    | 9                        |
| <b>Flna</b> (Filamin A)                       | 1175                   | 520                    | 803                      | 201                   | 494                      |
| <b>Timd4</b> (Binds Phosph. serine apopt. c.) | 0                      | 0                      | 0                        | 0                     | 0                        |
|                                               |                        |                        |                          |                       |                          |
| <b>D. Lipid mediators and metabolism</b>      |                        |                        |                          |                       |                          |
| <b>Alox15</b> (Arachinodate 15 lipoxygenase)  | 0                      | 0                      | 0                        | 0.3                   | 0                        |
| <b>Pla2g7</b> (Phosplipase A2)                | 15                     | 3                      | 149                      | 17                    | 26                       |
| <b>Alox5ap</b> (Arach. 5 lipoxyg. act prot.)  | 111                    | 81                     | 95                       | 85                    | 85                       |
| <b>Ptgis</b> (Prosaglandin I syntase)         | 0                      | 0                      | 0                        | 0                     | 0                        |
| <b>Alox5</b> (Arachinodate 5 lipoxygenase)    | 190                    | 188                    | 101                      | 467                   | 154                      |
| <b>Dpep2</b> (Dipeptidase 2 memb. b.)         | 77                     | 93                     | 47                       | 88                    | 85                       |
| <b>ApoE</b> (Apolipoprotein E)                | 2                      | 0.5                    | 15                       | 4                     | 0.6                      |
| <b>Pltp</b> (Phospholipid transfer protein)   | 1                      | 1                      | 3                        | 0.5                   | 1                        |

|                                                    |              |              |             |             |             |
|----------------------------------------------------|--------------|--------------|-------------|-------------|-------------|
| <b>Plin2</b> (Perilipin2 cytopl. lipid droplet b.) | <b>777</b>   | <b>250</b>   | <b>762</b>  | <b>91</b>   | <b>718</b>  |
| <b>Retnlb</b> (Resistin like beta)                 | <b>0</b>     | <b>0</b>     | <b>0</b>    | <b>0</b>    | <b>0</b>    |
| <b>Smpdl3a</b> (Sphingom. Pho.di. acid-I. 3)       | <b>3</b>     | <b>4</b>     | <b>5</b>    | <b>1</b>    | <b>5</b>    |
| <b>Lipn</b> (Lipase)                               | <b>11</b>    | <b>10</b>    | <b>29</b>   | <b>13</b>   | <b>27</b>   |
| <b>E. Complement proteins and their receptors</b>  |              |              |             |             |             |
| <b>Cfp</b> (Compl. factor P, Properdin)            | <b>991</b>   | <b>1017</b>  | <b>1203</b> | <b>542</b>  | <b>784</b>  |
| <b>C1qa</b> (Complement factor C1q A)              | <b>7</b>     | <b>19</b>    | <b>9</b>    | <b>13</b>   | <b>24</b>   |
| <b>C1qb</b> (Complement factor C1q B)              | <b>3</b>     | <b>8</b>     | <b>30</b>   | <b>1</b>    | <b>21</b>   |
| <b>C1qc</b> (Complement factor C1q C)              | <b>1</b>     | <b>4</b>     | <b>0.4</b>  | <b>0.2</b>  | <b>4</b>    |
| <b>C4b</b> (Complement factor 4B)                  | <b>0.1</b>   | <b>0.1</b>   | <b>2</b>    | <b>3</b>    | <b>0.6</b>  |
| <b>C4a</b> (Complement factor 4A)                  | <b>1</b>     | <b>0.2</b>   | <b>2</b>    | <b>2</b>    | <b>0.6</b>  |
| <b>Cfh</b> (Complement factor H)                   | <b>0</b>     | <b>0</b>     | <b>0</b>    | <b>0</b>    | <b>0</b>    |
| <b>Fcna</b> (Ficolin A) (FCN1)                     | <b>3198</b>  | <b>2681</b>  | <b>1284</b> | <b>1025</b> | <b>2183</b> |
| <b>Vsig4</b> (Comp C3b rec.)                       | <b>5</b>     | <b>4</b>     | <b>9</b>    | <b>1</b>    | <b>5</b>    |
| <b>C3</b> (Complement factor 3)                    | <b>2</b>     | <b>1</b>     | <b>9</b>    | <b>2</b>    | <b>0.1</b>  |
| <b>CFB</b> (Complement factor B)                   | <b>0.2</b>   | <b>0.1</b>   | <b>0.4</b>  | <b>12</b>   | <b>0</b>    |
| <b>C2</b> (Complement factor 2)                    | <b>14</b>    | <b>9</b>     | <b>7</b>    | <b>8</b>    | <b>12</b>   |
| <b>C3ar1</b> (C3a receptor)                        | <b>41</b>    | <b>23</b>    | <b>48</b>   | <b>4</b>    | <b>14</b>   |
| <b>F. Coagulation proteins</b>                     |              |              |             |             |             |
| <b>F5</b> (Coagulation factor V)                   | <b>40</b>    | <b>28</b>    | <b>8</b>    | <b>20</b>   | <b>19</b>   |
| <b>F10</b> (Coagulation factor X)                  | <b>0</b>     | <b>0</b>     | <b>0</b>    | <b>0</b>    | <b>0</b>    |
| <b>F7</b> (Coagulation factor VII)                 | <b>0</b>     | <b>0</b>     | <b>0</b>    | <b>0</b>    | <b>0</b>    |
| <b>F12</b> (Coagulation factor XII)                | <b>1</b>     | <b>1</b>     | <b>0.4</b>  | <b>6</b>    | <b>0.4</b>  |
| <b>F9</b> (Coagulation factor IX)                  | <b>0</b>     | <b>0</b>     | <b>0</b>    | <b>0</b>    | <b>0</b>    |
| <b>F2</b> (Thrombin)                               | <b>0</b>     | <b>0</b>     | <b>0</b>    | <b>0.3</b>  | <b>0</b>    |
| <b>G. Proteases</b>                                |              |              |             |             |             |
| <b>Mmp19</b> (Matrix Metalloprotease 19)           | <b>1</b>     | <b>1</b>     | <b>37</b>   | <b>0.5</b>  | <b>0.4</b>  |
| <b>Mmp9</b> (Matrix Metalloprotease 9)             | <b>9</b>     | <b>1</b>     | <b>50</b>   | <b>11</b>   | <b>0.4</b>  |
| <b>Mmp27</b> (Matrix Metalloprotease 27)           | <b>0</b>     | <b>0</b>     | <b>0</b>    | <b>0</b>    | <b>0</b>    |
| <b>Mmp12</b> (Matrix Metalloprotease 12)           | <b>0</b>     | <b>0</b>     | <b>0</b>    | <b>0</b>    | <b>0</b>    |
| <b>H. Protease Inhibitors</b>                      |              |              |             |             |             |
| <b>Cst3</b> (Cystatin C)                           | <b>3704</b>  | <b>4034</b>  | <b>2667</b> | <b>2446</b> | <b>4906</b> |
| <b>SLPI</b> (Secretory leukocyte prot inh.)        | <b>0.4</b>   | <b>0</b>     | <b>1</b>    | <b>0.2</b>  | <b>0.6</b>  |
| <b>Serpib2</b> (Serpine B2)                        | <b>38</b>    | <b>10</b>    | <b>21</b>   | <b>1</b>    | <b>5</b>    |
| <b>Timp2</b> (Metalloproteinase Inhibitor 2)       | <b>283</b>   | <b>198</b>   | <b>195</b>  | <b>233</b>  | <b>205</b>  |
| <b>Timp1</b> (Metalloproteinase Inhibitor 1)       | <b>725</b>   | <b>526</b>   | <b>1871</b> | <b>153</b>  | <b>533</b>  |
| <b>Serpib9</b> (Serpine B9)                        | <b>111</b>   | <b>59</b>    | <b>23</b>   | <b>28</b>   | <b>16</b>   |
| <b>I. Lysozomal proteins</b>                       |              |              |             |             |             |
| <b>Laptm5</b> (Lysosomal memb. prot 5)             | <b>6180</b>  | <b>2373</b>  | <b>2042</b> | <b>682</b>  | <b>2090</b> |
| <b>Psap</b> (Prosaposin glycosphingolipids)        | <b>12296</b> | <b>11791</b> | <b>6862</b> | <b>4277</b> | <b>8850</b> |
| <b>Man2b1</b> (Alpha-mannosidase)                  | <b>5</b>     | <b>4</b>     | <b>1</b>    | <b>1</b>    | <b>2</b>    |
| <b>Ctsb</b> (Cathepsin B)                          | <b>814</b>   | <b>422</b>   | <b>1399</b> | <b>56</b>   | <b>311</b>  |
| <b>Ctsd</b> (Cathepsin D)                          | <b>1171</b>  | <b>1110</b>  | <b>4241</b> | <b>876</b>  | <b>1163</b> |
| <b>Ctsl</b> (Cathepsin L) (CTSL1)                  | <b>19</b>    | <b>11</b>    | <b>430</b>  | <b>18</b>   | <b>28</b>   |
| <b>Ctsa</b> (Cathepsin A)                          | <b>192</b>   | <b>129</b>   | <b>254</b>  | <b>217</b>  | <b>236</b>  |
| <b>Ctss</b> (Cathepsin S)                          | <b>5290</b>  | <b>5923</b>  | <b>455</b>  | <b>1024</b> | <b>2853</b> |
| <b>Ctsz</b> (Cathepsin Z)                          | <b>1415</b>  | <b>928</b>   | <b>682</b>  | <b>280</b>  | <b>1151</b> |
| <b>Ctsh</b> (Cathepsin H)                          | <b>329</b>   | <b>425</b>   | <b>251</b>  | <b>127</b>  | <b>336</b>  |

|                                                        |      |       |      |      |       |
|--------------------------------------------------------|------|-------|------|------|-------|
| <b>Ctsc</b> (Cathepsin C)                              | 145  | 172   | 29   | 62   | 118   |
| <b>Ctso</b> (Cathepsin O)                              | 9    | 14    | 3    | 3    | 11    |
| <b>Ctsf</b> (Cathepsin F)                              | 1    | 2     | 1    | 3    | 1.6   |
| <b>Ctse</b> (Cathepsin E)                              | 0    | 0     | 0    | 0    | 0     |
| <b>J Immunoglobulin receptors</b>                      |      |       |      |      |       |
| <b>Fcgrt</b> (FcRN)                                    | 380  | 243   | 65   | 129  | 104   |
| <b>Fcgr1A</b> (Fc gamma receptor 1)                    | 51   | 39    | 23   | 13   | 133   |
| <b>Fcgr2b</b> (Fc gamma receptor 2B)                   | 59   | 23    | 44   | 333  | 170   |
| <b>Fcgr2a</b> (Fc gamma receptor 2A)                   | 580  | 404   | 350  | 55   | 756   |
| <b>Fcer1g</b> (Fc-epsilon receptor gamma)              | 1173 | 1426  | 1526 | 567  | 2096  |
| <b>K. MHC Class I and II</b>                           |      |       |      |      |       |
| <b>B2m</b> (beta-2 microglobulin)                      | 5521 | 10399 | 4581 | 1885 | 11986 |
| <b>HLA-A</b>                                           | 1548 | 1186  | 1598 | 420  | 383   |
| <b>HLA-B</b>                                           | 6    | 8     | 3005 | 1780 | 39    |
| <b>HLA-C</b>                                           | 2979 | 1265  | 3    | 403  | 5     |
| <b>HLA-E</b>                                           | 2984 | 2412  | 3903 | 3178 | 3965  |
| <b>HLA-DRB1</b>                                        | 3023 | 26    | 2126 | 1820 | 21    |
| <b>HLA-DRA</b>                                         | 5490 | 7224  | 2592 | 934  | 6558  |
| <b>HLA-DPA1</b>                                        | 2375 | 4872  | 2807 | 1656 | 5268  |
| <b>HLA-DPB1</b>                                        | 1029 | 2162  | 978  | 551  | 1478  |
| <b>HLA-DPB2</b>                                        | 0    | 0.4   | 0    | 0    | 0     |
| <b>HLA-DQB2</b>                                        | 0    | 0     | 0    | 0    | 0.3   |
| <b>HLA-DQA1</b>                                        | 103  | 6     | 285  | 86   | 9     |
| <b>HLA-DQA2</b>                                        | 0    | 0.7   | 0    | 0    | 1     |
| <b>L. Classical surface receptors/markers</b>          |      |       |      |      |       |
| <b>CD14</b>                                            | 1697 | 1633  | 1596 | 991  | 1525  |
| <b>CD40</b>                                            | 6    | 11    | 25   | 10   | 19    |
| <b>CD28</b>                                            | 1    | 0.7   | 1    | 0    | 0     |
| <b>CD86</b> (B7-2)                                     | 236  | 207   | 47   | 34   | 152   |
| <b>CD80</b> (B7-1)                                     | 2    | 0.4   | 14   | 2    | 1     |
| <b>CD83</b> (activation marker for dendritic c.)       | 18   | 19    | 362  | 44   | 39    |
| <b>CD244</b> (KIR2DL4)                                 | 31   | 49    | 70   | 63   | 53    |
| <b>CD84</b> (Ig superfamily)                           | 20   | 51    | 128  | 26   | 32    |
| <b>CD209</b> (Rec. possibly inv. in phagoc.)           | 4    | 2.5   | 0.1  | 1    | 2     |
| <b>CD51</b> (CD5 like bind CD36)                       | 0    | 0     | 0    | 0    | 0     |
| <b>Adgre1</b> (F4/80, Emr1, mucin like)                | 87   | 79    | 36   | 17   | 65    |
| <b>M. Scavenger receptors</b>                          |      |       |      |      |       |
| <b>Marco</b> (MARCO)                                   | 1    | 0.4   | 6    | 2    | 4     |
| <b>CD163</b> (Scavenger rec. )                         | 225  | 169   | 778  | 37   | 173   |
| <b>CD36</b> (Scarb3) (Lung 1230)                       | 250  | 392   | 241  | 405  | 315   |
| <b>CD68</b> (binds Oxidized LDL)                       | 1273 | 1143  | 1536 | 546  | 564   |
| <b>CD177</b>                                           | 0.3  | 0     | 1    | 0.5  | 0.1   |
| <b>Scara3 and 5</b>                                    | 0    | 0     | 0    | 0    | 0     |
| <b>Scarb2</b>                                          | 28   | 50    | 307  | 125  | 78    |
| <b>Scarb1</b>                                          | 22   | 30    | 5    | 15   | 12    |
| <b>N. Cytokine, chemokine and endothelin receptors</b> |      |       |      |      |       |
| <b>Fgfr1</b> (FGF receptor 1)                          | 0.1  | 0     | 0.8  | 0    | 0     |
| <b>Csf1r</b> (M-CSF receptor)                          | 129  | 135   | 691  | 169  | 114   |

|                                                |             |             |             |             |             |
|------------------------------------------------|-------------|-------------|-------------|-------------|-------------|
| <b>Csf2ra</b> (GM-CSF receptor alpha chain)    | <b>47</b>   | <b>53</b>   | <b>362</b>  | <b>100</b>  | <b>74</b>   |
| <b>Csf3r</b> (G-CSF receptor CD114)            | <b>1236</b> | <b>900</b>  | <b>1031</b> | <b>3129</b> | <b>939</b>  |
| <b>Ccr5</b> (CCR-5 receptor)                   | <b>2</b>    | <b>3</b>    | <b>37</b>   | <b>1</b>    | <b>1</b>    |
| <b>Ccr1</b> (CCR-1 receptor)                   | <b>34</b>   | <b>53</b>   | <b>30</b>   | <b>18</b>   | <b>17</b>   |
| <b>Tnfrsf1b</b> (TNF receptor rec. Subf. 1b)   | <b>1515</b> | <b>1100</b> | <b>780</b>  | <b>267</b>  | <b>1101</b> |
| <b>Tnfrsf1a</b> (TNF receptor rec. Subf. 1a)   | <b>199</b>  | <b>172</b>  | <b>18</b>   | <b>24</b>   | <b>20</b>   |
| <b>Tnfrsf11a</b> (TNF receptor rec. Subf. 11a) | <b>0.5</b>  | <b>0.4</b>  | <b>7</b>    | <b>0.7</b>  | <b>0.8</b>  |
| <b>Tnfrsf21</b> (TNF receptor rec. Subf. 21)   | <b>25</b>   | <b>3</b>    | <b>30</b>   | <b>0.7</b>  | <b>7</b>    |
| <b>Tnfrsf14</b> (TNF receptor rec. Subf. 14)   | <b>41</b>   | <b>48</b>   | <b>95</b>   | <b>60</b>   | <b>65</b>   |
| <b>Il10ra</b> (IL-10 receptor alpha)           | <b>609</b>  | <b>443</b>  | <b>237</b>  | <b>357</b>  | <b>422</b>  |
| <b>Il15ra</b> (IL-15 receptor alpha)           | <b>14</b>   | <b>29</b>   | <b>5</b>    | <b>25</b>   | <b>28</b>   |
| <b>Il6r</b> (IL-6 receptor alpha)              | <b>80</b>   | <b>101</b>  | <b>159</b>  | <b>117</b>  | <b>62</b>   |
| <b>Il4r</b> (IL-4 receptor alpha)              | <b>42</b>   | <b>37</b>   | <b>70</b>   | <b>113</b>  | <b>39</b>   |
| <b>IL3ra</b> (IL-3 receptor alpha)             | <b>8</b>    | <b>9</b>    | <b>57</b>   | <b>9</b>    | <b>20</b>   |
| <b>Il13ra1</b> (IL-13 receptor alpha1)         | <b>123</b>  | <b>122</b>  | <b>10</b>   | <b>15</b>   | <b>46</b>   |
| <b>IL21r</b> (IL-21 receptor)                  | <b>0</b>    | <b>3</b>    | <b>11</b>   | <b>0.7</b>  | <b>2</b>    |
| <b>IL27ra</b> (IL-27 receptor alpha)           | <b>32</b>   | <b>38</b>   | <b>101</b>  | <b>27</b>   | <b>26</b>   |
| <b>Il2rg</b> (IL-2 receptor gamma)             | <b>47</b>   | <b>56</b>   | <b>66</b>   | <b>21</b>   | <b>36</b>   |
| <b>Il2rb</b> (IL-2 receptor beta)              | <b>1</b>    | <b>2</b>    | <b>8</b>    | <b>0.3</b>  | <b>41</b>   |
| <b>Il1r1</b> (Receptor 1 for IL1 alpha)        | <b>2</b>    | <b>0.7</b>  | <b>3</b>    | <b>1</b>    | <b>0.4</b>  |
| <b>Ednrb</b> (Endothelin B receptor)           | <b>0.2</b>  | <b>0.4</b>  | <b>6</b>    | <b>0</b>    | <b>0.1</b>  |

#### **O. Toll Like Receptors and accessory proteins**

|                                         |           |            |            |           |            |
|-----------------------------------------|-----------|------------|------------|-----------|------------|
| <b>Tlr4</b> (TLR-4)                     | <b>24</b> | <b>44</b>  | <b>197</b> | <b>25</b> | <b>20</b>  |
| <b>Ly96</b> (MD2 LPS binding with TLR4) | <b>8</b>  | <b>10</b>  | <b>0.2</b> | <b>5</b>  | <b>6</b>   |
| <b>Tlr7</b> (TLR-7)                     | <b>9</b>  | <b>26</b>  | <b>7</b>   | <b>2</b>  | <b>12</b>  |
| <b>Tlr1</b> (TLR-1)                     | <b>6</b>  | <b>27</b>  | <b>22</b>  | <b>11</b> | <b>10</b>  |
| <b>Tlr8</b> (TLR-8)                     | <b>46</b> | <b>137</b> | <b>40</b>  | <b>26</b> | <b>155</b> |
| <b>Tlr2</b> (TLR-2)                     | <b>40</b> | <b>47</b>  | <b>299</b> | <b>12</b> | <b>34</b>  |
| <b>Tlr3</b> (TLR-3)                     | <b>0</b>  | <b>0</b>   | <b>0</b>   | <b>0</b>  | <b>0</b>   |
| <b>Tlr6</b> (TLR-6)                     | <b>2</b>  | <b>2</b>   | <b>9</b>   | <b>2</b>  | <b>0.7</b> |
| <b>Nlrc4</b> (Inflammasome related)     | <b>4</b>  | <b>5</b>   | <b>2</b>   | <b>8</b>  | <b>0.7</b> |

#### **P. Cell adhesion**

|                                                   |             |             |             |            |             |
|---------------------------------------------------|-------------|-------------|-------------|------------|-------------|
| <b>Itgam</b> (Integrin alpha m, CD11b)            | <b>245</b>  | <b>216</b>  | <b>82</b>   | <b>304</b> | <b>139</b>  |
| <b>Itga6</b> (Integrin alpha 6)                   | <b>0</b>    | <b>0.5</b>  | <b>1</b>    | <b>0.2</b> | <b>0</b>    |
| <b>Itgb2</b> (Integrin beta 2)                    | <b>1975</b> | <b>1423</b> | <b>862</b>  | <b>685</b> | <b>1504</b> |
| <b>Itgb1</b> (Integrin beta 1)                    | <b>161</b>  | <b>160</b>  | <b>330</b>  | <b>392</b> | <b>265</b>  |
| <b>Itga4</b> (Integrin alpha 4)                   | <b>230</b>  | <b>331</b>  | <b>44</b>   | <b>144</b> | <b>408</b>  |
| <b>Itgb7</b> (Integrin beta 7)                    | <b>17</b>   | <b>21</b>   | <b>5</b>    | <b>6</b>   | <b>8</b>    |
| <b>Itgav</b> (Integrin alpha v)                   | <b>2</b>    | <b>10</b>   | <b>119</b>  | <b>11</b>  | <b>6</b>    |
| <b>Itga9</b> (Integrin alpha 9)                   | <b>2</b>    | <b>1</b>    | <b>0.6</b>  | <b>4</b>   | <b>2</b>    |
| <b>Itgb3</b> (Integrin beta 3)                    | <b>3</b>    | <b>4</b>    | <b>1</b>    | <b>0.7</b> | <b>1</b>    |
| <b>Itgax</b> (Integrin alpha x, CD11c)            | <b>249</b>  | <b>216</b>  | <b>673</b>  | <b>126</b> | <b>140</b>  |
| <b>Selp</b> (P-selectin)                          | <b>0</b>    | <b>0.6</b>  | <b>0</b>    | <b>0.4</b> | <b>0.4</b>  |
| <b>Emilin2</b> (Elastin microfibril loc. prot. 2) | <b>162</b>  | <b>218</b>  | <b>404</b>  | <b>213</b> | <b>369</b>  |
| <b>Icam2</b> (ICAM 2)                             | <b>39</b>   | <b>52</b>   | <b>73</b>   | <b>3</b>   | <b>38</b>   |
| <b>Lgals3</b> (Galectin3, MAC2)                   | <b>249</b>  | <b>375</b>  | <b>1533</b> | <b>109</b> | <b>414</b>  |

#### **Q. Chemokines and Cytokines**

|                                          |          |            |           |            |            |
|------------------------------------------|----------|------------|-----------|------------|------------|
| <b>Pf4</b> (Platelet factor 4)           | <b>3</b> | <b>4</b>   | <b>3</b>  | <b>5</b>   | <b>3</b>   |
| <b>Cxcl13</b> (B-cell attracting (BCA-1) | <b>0</b> | <b>0</b>   | <b>0</b>  | <b>0.5</b> | <b>0</b>   |
| <b>Ccl24</b> (Eotaxin-2 or MPIF-2)       | <b>1</b> | <b>0.6</b> | <b>36</b> | <b>0</b>   | <b>0.1</b> |

|                                                   |                  |                    |                  |                  |                  |
|---------------------------------------------------|------------------|--------------------|------------------|------------------|------------------|
| <b>Cxcl16</b> (T-cell and NK cell attracting)     | <b>307</b>       | <b>134</b>         | <b>972</b>       | <b>55</b>        | <b>432</b>       |
| <b>Cxcl14</b> (attracting activated NK cells)     | <b>0</b>         | <b>0</b>           | <b>0.4</b>       | <b>0</b>         | <b>0</b>         |
| <b>Cxcl2</b> (also named MIP2 alpha)              | <b>12</b>        | <b>3</b>           | <b>20</b>        | <b>6</b>         | <b>3</b>         |
| <b>Cxcl1</b> (Neutrophil attr.(Gro-a or NAP-3))   | <b>4</b>         | <b>2</b>           | <b>3</b>         | <b>4</b>         | <b>0.4</b>       |
| <b>Cxcl12</b> (also named SDF1)                   | <b>0</b>         | <b>0</b>           | <b>0</b>         | <b>0</b>         | <b>0</b>         |
| <b>Ccl5</b> (Rantes attr. T-cells, Eos and Baso.) | <b>8</b>         | <b>7</b>           | <b>13</b>        | <b>4</b>         | <b>15</b>        |
| <b>Ccl11</b> (Eotaxin 1)                          | <b>0</b>         | <b>0</b>           | <b>0</b>         | <b>0</b>         | <b>0</b>         |
| <b>Tgfb2</b> (TGF- beta 2)                        | <b>0.1</b>       | <b>0</b>           | <b>0.6</b>       | <b>0</b>         | <b>0</b>         |
| <b>Tgfb1</b> (TGF- beta 1)                        | <b>918</b>       | <b>555</b>         | <b>1411</b>      | <b>718</b>       | <b>866</b>       |
| <b>Il16</b> (IL-16)                               | <b>0</b>         | <b>0</b>           | <b>0</b>         | <b>0</b>         | <b>0</b>         |
| <b>Csf1</b> (M-CSF)                               | <b>6</b>         | <b>4</b>           | <b>2</b>         | <b>45</b>        | <b>5</b>         |
| <b>IL18</b> (IL-18)                               | <b>58</b>        | <b>53</b>          | <b>32</b>        | <b>16</b>        | <b>51</b>        |
| <b>Il18bp</b> (IL-18 binding prot.)               | <b>6</b>         | <b>11</b>          | <b>42</b>        | <b>9</b>         | <b>12</b>        |
| <b>IL1a</b> (IL-1 alpha)                          | <b>0.2</b>       | <b>0.1</b>         | <b>26</b>        | <b>0</b>         | <b>0</b>         |
| <b>Il15</b> (IL-15)                               | <b>6</b>         | <b>22</b>          | <b>4</b>         | <b>19</b>        | <b>16</b>        |
| <b>IL27</b> (IL-27)                               | <b>7</b>         | <b>5</b>           | <b>3</b>         | <b>11</b>        | <b>12</b>        |
| <b>Il13</b> (IL-13)                               | <b>0</b>         | <b>0</b>           | <b>0</b>         | <b>0.5</b>       | <b>0</b>         |
| <b>Il12a &amp; b</b> (IL-12a and b)               | <b>1 &amp; 0</b> | <b>1 &amp; 0.1</b> | <b>0 &amp; 0</b> | <b>6 &amp; 0</b> | <b>1 &amp; 0</b> |
| <b>Tnf</b> (TNF-alpha)                            | <b>131</b>       | <b>91</b>          | <b>228</b>       | <b>72</b>        | <b>86</b>        |
| <b>Igf1</b> (IGF-1)                               | <b>0</b>         | <b>0</b>           | <b>0</b>         | <b>0</b>         | <b>0.1</b>       |
| <b>Egf</b> (EGF)                                  | <b>0</b>         | <b>0.1</b>         | <b>0</b>         | <b>0</b>         | <b>0</b>         |
| <b>Pdgfa</b> (PDGF-A)                             | <b>0.4</b>       | <b>0.4</b>         | <b>5</b>         | <b>0.5</b>       | <b>0.6</b>       |
| <b>Pdgfb</b> (PDGF-B)                             | <b>0.2</b>       | <b>0</b>           | <b>40</b>        | <b>0</b>         | <b>0</b>         |
| <b>Vegfa</b> (VEGF-A)                             | <b>183</b>       | <b>37</b>          | <b>185</b>       | <b>152</b>       | <b>155</b>       |
| <b>Vegfb</b> (VEGF-B)                             | <b>11</b>        | <b>4</b>           | <b>22</b>        | <b>2</b>         | <b>6</b>         |

#### **R. Signaling components**

|                                               |             |             |             |            |             |
|-----------------------------------------------|-------------|-------------|-------------|------------|-------------|
| <b>Tyrobp</b> (TYRO protein kinase-bi. prot.) | <b>4617</b> | <b>4899</b> | <b>3882</b> | <b>727</b> | <b>4188</b> |
| <b>Dab2</b> (Disabled homolog 2)              | <b>1</b>    | <b>2</b>    | <b>102</b>  | <b>1</b>   | <b>2</b>    |
| <b>Pde2a</b> (cGMP-dep. cyclic phosphodi)     | <b>5</b>    | <b>3</b>    | <b>23</b>   | <b>1</b>   | <b>4</b>    |
| <b>Btk</b>                                    | <b>50</b>   | <b>63</b>   | <b>25</b>   | <b>15</b>  | <b>29</b>   |

#### **S. Transcription factors**

|                                               |             |            |            |            |            |
|-----------------------------------------------|-------------|------------|------------|------------|------------|
| <b>Gata6</b> (GATA-6)                         | <b>0</b>    | <b>0.7</b> | <b>0</b>   | <b>0</b>   | <b>0.1</b> |
| <b>Gata3</b>                                  | <b>0.3</b>  | <b>0</b>   | <b>2</b>   | <b>0</b>   | <b>3</b>   |
| <b>Gata2</b>                                  | <b>0.3</b>  | <b>0.4</b> | <b>0.4</b> | <b>0</b>   | <b>0.3</b> |
| <b>Gata1</b>                                  | <b>0</b>    | <b>0</b>   | <b>0</b>   | <b>0</b>   | <b>0</b>   |
| <b>Mitf</b>                                   | <b>4</b>    | <b>11</b>  | <b>37</b>  | <b>4</b>   | <b>5</b>   |
| <b>Spi1</b> (Pu.1)                            | <b>1307</b> | <b>763</b> | <b>729</b> | <b>445</b> | <b>480</b> |
| <b>Myb</b>                                    | <b>0.2</b>  | <b>0.1</b> | <b>0</b>   | <b>0</b>   | <b>0</b>   |
| <b>Runx1</b>                                  | <b>42</b>   | <b>22</b>  | <b>12</b>  | <b>56</b>  | <b>11</b>  |
| <b>Runx3</b>                                  | <b>166</b>  | <b>79</b>  | <b>485</b> | <b>158</b> | <b>205</b> |
| <b>Creb3l1</b>                                | <b>0</b>    | <b>0</b>   | <b>0.1</b> | <b>0</b>   | <b>0</b>   |
| <b>Zeb2</b> (Zinc finger corepressor)         | <b>242</b>  | <b>302</b> | <b>396</b> | <b>377</b> | <b>321</b> |
| <b>Tox2</b>                                   | <b>0.3</b>  | <b>0</b>   | <b>0.1</b> | <b>0</b>   | <b>0.1</b> |
| <b>Ikzf1</b> (Ikaros, Zinc finger transcr. f) | <b>54</b>   | <b>36</b>  | <b>21</b>  | <b>28</b>  | <b>31</b>  |
| <b>Foxp3</b>                                  | <b>1</b>    | <b>0.6</b> | <b>0.4</b> | <b>0.2</b> | <b>0.1</b> |
